# Supplementary material for: Analytical Validation and Assessment of Baseline Fecal Glucocorticoid Metabolites in Northern Sea Otters (Enhydra lutris kenyoni) in Human Care
Source: MDPI journal article supplement (doi:10.3390/ani13132175), 2023-07-02
Supplement: s1 [file s1]

## Supplement

*Table S1: Enzyme immunosorbent assay details of commercially available kits (Enzo Life Sciences Inc., New York, USA). All information is provided in kit inserts by the manufacturer.*

| Hormone (assay catalog number)  | Antibody Source  | Standard Range                                                                     | Sensitivity | Intra-Assay %CV | Inter-Assay %CV | Cross Reactivities                                                                                                                                                                                                                                                                |
|---------------------------------|------------------|------------------------------------------------------------------------------------|-------------|-----------------|-----------------|-----------------------------------------------------------------------------------------------------------------------------------------------------------------------------------------------------------------------------------------------------------------------------------|
| Cortisol<br>(ADI-900-071)       | Mouse monoclonal | 100 ng/g<br>50 ng/g<br>25 ng/g<br>12.5 ng/g<br>6.25 ng/g<br>3.13 ng/g<br>1.56 ng/g | 0.5672 ng/g | 6.6 – 10.5%     | 7.8 – 13.4%     | Cortisol 100%<br>Prednisolone 122.35%<br>Corticosterone 27.68%<br>11-deoxycortisol 4.0%<br>Progesterone 3.64%<br>Prednisone 0.85%<br>Testosterone 0.12%<br>Androstenedione < 0.1%<br>Cortisone < 0.1%<br>Estradiol < 0.1%                                                         |
| Corticosterone<br>(ADI-900-097) | Sheep polyclonal | 200 ng/g<br>40 ng/g<br>8 ng/g<br>1.6 ng/g<br>0.32 ng/g                             | 0.2699 ng/g | 6.6 – 8.4%      | 7.8 – 13.1%     | Corticosterone 100%<br>Deoxycorticosterone 28.6%<br>Progesterone 1.7%<br>Testosterone 0.13%<br>Tetrahydrocorticosterone 0.28%<br>Aldosterone 0.18%<br>Cortisol 0.046%<br>Pregnenolone <0.03%<br>β-Estradiol <0.03%<br>Cortisone <0.03%<br>11-dehydrocorticosterone acetate <0.03% |
